# Supplementary material for: FSTL3 is associated with prognosis and immune cell infiltration in lung adenocarcinoma
Source: Springer Nature journal article supplement (doi:10.1007/s00432-023-05553-w), 2024-01-01
Supplement: MOESM1 [file 26642520]

Journal: International Journal of Clinical Oncology

Title: FSTL3 is associated with prognosis and immune cell infiltration in lung adenocarcinoma

Xiangzhi Meng<sup>a</sup>, Xiaojian Zhao<sup>a</sup>, Boxuan Zhou<sup>a</sup>, Weijian Song<sup>a</sup>, Yicheng Liang<sup>b</sup>, Mei Liang<sup>a</sup>, Minjun Du<sup>a</sup>, Jianwei Shi<sup>a</sup>, and Yushun Gao<sup>a\*</sup>

a Department of Thoracic Surgery, National Cancer Center/National Clinical Research Center for Cancer/Cancer Hospital, Chinese Academy of Medical Sciences and Peking Union Medical College, Chaoyang District, Panjiayuan, Nanli 17, Beijing 100021, People's Republic of China

b Department of Thoracic Surgery, Sun Yat-sen Memorial Hospital, Sun Yat-sen University, 107 Yanjiang West Road, Guangzhou, 510120, China

Xiangzhi Meng and Xiaojian Zhao contributed equally to this work

\*Corresponding Author :

Yushun Gao

E-mail address: ysgaopumc@163.com

Telephone number: +86 010-87787130

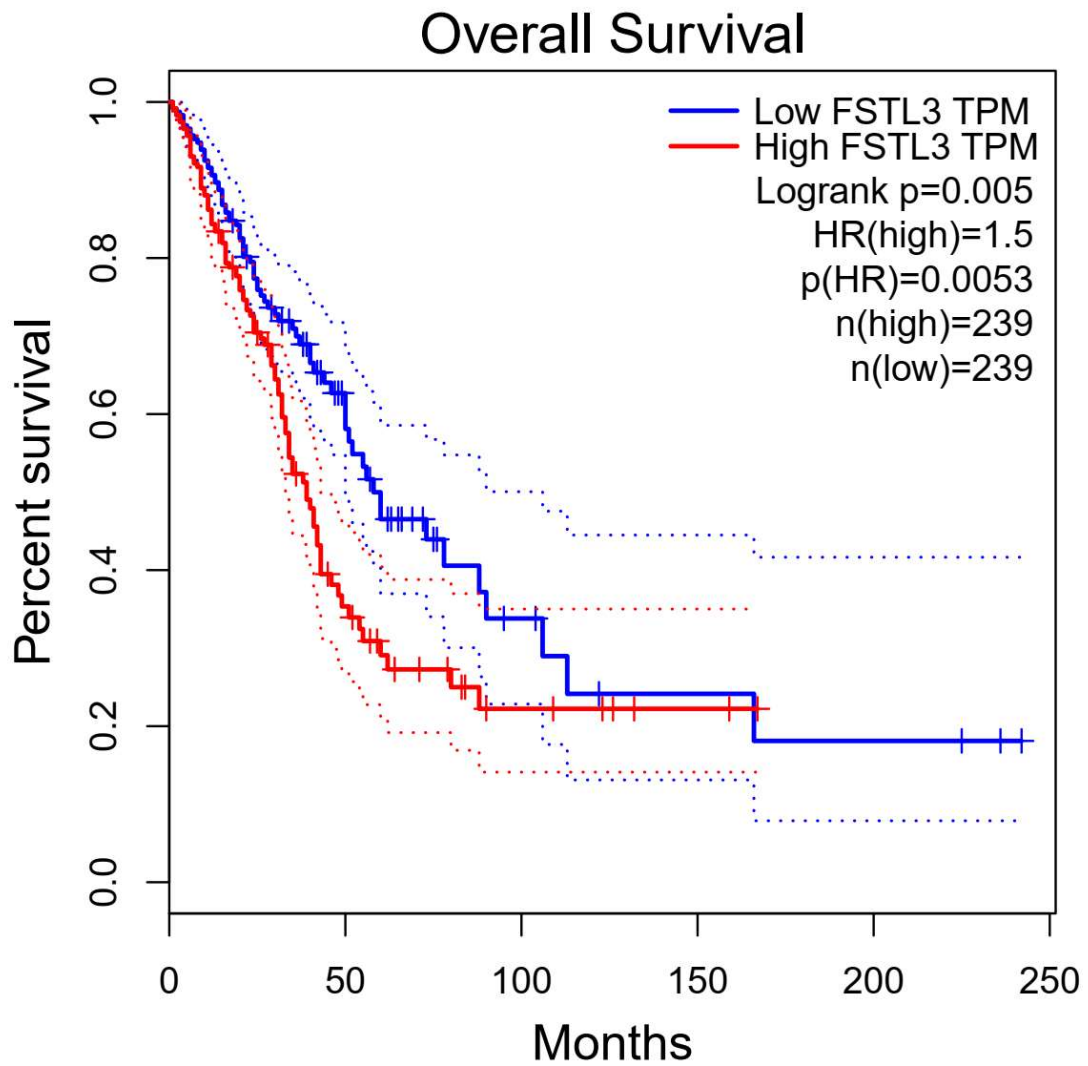

Supplemental Fig. 1 The analysis of overall survival (OS) and FSTL3 expression of patients with lung adenocarcinoma in the GEPIA online database

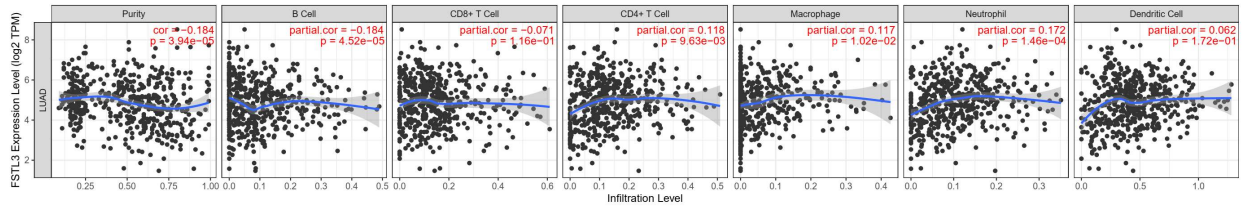

Supplemental Fig. 2 the correlation between FSTL3 expression and immune cell infiltration in tumor tissues in the TIMER online database

Supplementary table 1. the corresponding clinical characteristics of the patients in group according to FSTL3 expression

| Characteristics                | Low expression of FSTL3 | High expression of FSTL3 | P value      |
|--------------------------------|-------------------------|--------------------------|--------------|
| n                              | 269                     | 270                      |              |
| Pathologic T stage, n (%)      |                         |                          | 0.484        |
| T1                             | 91 (17%)                | 85 (15.9%)               |              |
| T2                             | 149 (27.8%)             | 143 (26.7%)              |              |
| T3                             | 20 (3.7%)               | 29 (5.4%)                |              |
| T4                             | 8 (1.5%)                | 11 (2.1%)                |              |
| Pathologic N stage, n (%)      |                         |                          | 0.054        |
| N0                             | 188 (35.9%)             | 162 (31%)                |              |
| N1                             | 41 (7.8%)               | 56 (10.7%)               |              |
| N2                             | 29 (5.5%)               | 45 (8.6%)                |              |
| N3                             | 1 (0.2%)                | 1 (0.2%)                 |              |
| Pathologic M stage, n (%)      |                         |                          | 0.571        |
| M0                             | 182 (46.7%)             | 183 (46.9%)              |              |
| M1                             | 11 (2.8%)               | 14 (3.6%)                |              |
| Pathologic stage, n (%)        |                         |                          | <b>0.031</b> |
| Stage I                        | 163 (30.7%)             | 133 (25%)                |              |
| Stage II                       | 57 (10.7%)              | 68 (12.8%)               |              |
| Stage III                      | 32 (6%)                 | 52 (9.8%)                |              |
| Stage IV                       | 12 (2.3%)               | 14 (2.6%)                |              |
| Primary therapy outcome, n (%) |                         |                          | 0.876        |
| PD                             | 35 (7.8%)               | 36 (8%)                  |              |
| SD                             | 18 (4%)                 | 20 (4.5%)                |              |
| PR                             | 2 (0.4%)                | 4 (0.9%)                 |              |
| CR                             | 166 (37%)               | 168 (37.4%)              |              |

| Characteristics           | Low expression of FSTL3 | High expression of FSTL3 | P value      |
|---------------------------|-------------------------|--------------------------|--------------|
| Gender, n (%)             |                         |                          | 0.577        |
| Female                    | 141 (26.2%)             | 148 (27.5%)              |              |
| Male                      | 128 (23.7%)             | 122 (22.6%)              |              |
| Race, n (%)               |                         |                          | 0.322        |
| Asian                     | 5 (1.1%)                | 3 (0.6%)                 |              |
| Black or African American | 32 (6.8%)               | 23 (4.9%)                |              |
| White                     | 199 (42.2%)             | 210 (44.5%)              |              |
| Age, n (%)                |                         |                          | 0.254        |
| ≤ 65                      | 135 (26%)               | 122 (23.5%)              |              |
| > 65                      | 125 (24%)               | 138 (26.5%)              |              |
| OS event, n (%)           |                         |                          | <b>0.021</b> |
| Alive                     | 186 (34.5%)             | 161 (29.9%)              |              |
| Dead                      | 83 (15.4%)              | 109 (20.2%)              |              |
